# Supplementary material for: Retrotransposon-Derived Promoter of Mammalian Aebp2
Source: PLoS One. 2015 Apr 27;10(4):e0126966. doi: 10.1371/journal.pone.0126966 (PMC4411029; doi:10.1371/journal.pone.0126966)
Supplement: S2 Table — (XLSX) [file pone.0126966.s008.xlsx]

## Sheet: Mouse P1
		chr	position (mm9)	total	Methylated			chr	position (mm9)	total	Methylated			chr	position (mm9)	total	Methylated			chr	position (mm9)	total	Methylated			chr	position (mm9)	total	Methylated			chr	position (mm9)	total	Methylated			chr	position (mm9)	total	Methylated			chr	position (mm9)	total	Methylated
	Zygote-Smith-1	chr6	140571319	56	0		2-cell-Smith-1	chr6	140571319	18	0		4-cell-mouse-1	chr6	140571319	28	0		8 cell-mouse-1	chr6	140571319	115	54		ICM-AJ-Smith-1	chr6	140571319	6	0		E6.5-1	chr6	140571319	62	1		E7.5-1	chr6	140571319	48	2		Heart	chr6	140571319	22	0		P1-mouse-brain-1
		chr6	140571362	43	0			chr6	140571362	9	0			chr6	140571362	27	0			chr6	140571362	20	3			chr6	140571362	3	0			chr6	140571362	39	7			chr6	140571362	40	6			chr6	140571362	9	6
		chr6	140571383	46	0			chr6	140571383	9	0			chr6	140571383	26	0			chr6	140571383	22	4			chr6	140571383	3	0			chr6	140571383	40	5			chr6	140571383	40	2			chr6	140571383	10	5
		chr6	140571387	45	3			chr6	140571387	9	0			chr6	140571387	27	0			chr6	140571387	22	11			chr6	140571387	2	0			chr6	140571387	40	9			chr6	140571387	40	7			chr6	140571387	10	8
		chr6	140571390	45	0			chr6	140571390	9	0			chr6	140571390	27	0			chr6	140571390	20	10			chr6	140571390	3	0			chr6	140571390	39	6			chr6	140571390	39	3			chr6	140571390	10	1
	Zygote-Smith-2						2-cell-Smith-2						4-cell-mouse-2	chr6	140571319	179	106		8 cell-mouse-2	chr6	140571319	101	0		ICM-AJ-Smith-2	chr6	140571319	27	0		E6.5-2	chr6	140571319	46	6		E7.5-2	chr6	140571319	40	3								P1-mouse-brain-2
		chr6	140571362	3	1			chr6	140571362	6	0			chr6	140571362	23	0			chr6	140571362	15	0			chr6	140571362	14	0			chr6	140571362	27	6			chr6	140571362	16	4
		chr6	140571383	2	0			chr6	140571383	6	0			chr6	140571383	23	0			chr6	140571383	15	5			chr6	140571383	14	0			chr6	140571383	27	4			chr6	140571383	16	4
		chr6	140571387	2	0			chr6	140571387	6	0			chr6	140571387	23	0			chr6	140571387	15	5			chr6	140571387	14	0			chr6	140571387	27	9			chr6	140571387	16	5
		chr6	140571390	2	0			chr6	140571390	6	0			chr6	140571390	23	0			chr6	140571390	15	0			chr6	140571390	14	0			chr6	140571390	27	2			chr6	140571390	16	1
	Zygote-Smith-3	chr6	140571319	401	0		2-cell-Smith-3	chr6	140571319	154	0		4-cell-mouse-4	chr6	140571319	184	0		8 cell-mouse-3	chr6	140571319	161	15		ICM-AJ-Smith-3	chr6	140571319	11	0		E6.5-3	chr6	140571319	24	0		E7.5-3	chr6	140571319	24	2
		chr6	140571362	163	0			chr6	140571362	71	0			chr6	140571362	20	2			chr6	140571362	33	9			chr6	140571362	6	0			chr6	140571362	15	3			chr6	140571362	32	12
		chr6	140571383	163	0			chr6	140571383	71	5			chr6	140571383	19	0			chr6	140571383	34	9			chr6	140571383	6	0			chr6	140571383	14	2			chr6	140571383	32	6
		chr6	140571387	163	0			chr6	140571387	70	12			chr6	140571387	20	2			chr6	140571387	34	9			chr6	140571387	6	0			chr6	140571387	15	3			chr6	140571387	32	12
		chr6	140571390	162	0			chr6	140571390	70	5			chr6	140571390	20	0			chr6	140571390	33	3			chr6	140571390	6	1			chr6	140571390	15	2			chr6	140571390	31	4
	Zygote-Smith-4	chr6	140571319	56	0		2-cell-Smith-4						4-cell-mouse-5	chr6	140571319	322	0		8 cell-mouse-4	chr6	140571319	159	11		ICM-AJ-Smith-4	chr6	140571319	1	0		E6.5-4	chr6	140571319	63	1		E7.5-4	chr6	140571319	24	2
		chr6	140571362	54	0			chr6	140571362	13	0			chr6	140571362	97	0			chr6	140571362	87	26			chr6	140571362	5	0			chr6	140571362	38	1			chr6	140571362	32	12
		chr6	140571383	57	1			chr6	140571383	16	0			chr6	140571383	97	0			chr6	140571383	89	12			chr6	140571383	6	0			chr6	140571383	38	3			chr6	140571383	32	6
		chr6	140571387	56	0			chr6	140571387	14	0			chr6	140571387	96	0			chr6	140571387	89	12			chr6	140571387	5	0			chr6	140571387	38	8			chr6	140571387	32	12
		chr6	140571390	57	0			chr6	140571390	16	0			chr6	140571390	95	0			chr6	140571390	89	3			chr6	140571390	5	1			chr6	140571390	38	2			chr6	140571390	31	4
	Zygote-Smith-no-pb-1	chr6	140571319	37	0		2-cell-Smith-no pb-1	chr6	140571319	26	1		4-cell-mouse-6	chr6	140571319	139	0		8 cell mouse-5	chr6	140571319	153	28														E7.5-5	chr6	140571319	34	5
		chr6	140571362	1	0			chr6	140571362	21	0			chr6	140571362	55	2			chr6	140571362	85	31															chr6	140571362	19	5
		chr6	140571941	3	0			chr6	140571383	22	8			chr6	140571383	55	0			chr6	140571383	84	17															chr6	140571383	19	3
		chr6	140571946	3	0			chr6	140571387	21	11			chr6	140571387	56	0			chr6	140571387	83	17															chr6	140571387	19	3
		chr6	140571954	3	0			chr6	140571390	22	0			chr6	140571390	56	0			chr6	140571390	83	7															chr6	140571390	19	1
	Zygote-Smith-no-pb-2	chr6	140571319	39	0		2-cell-Smith-no pb-2	chr6	140571362	2	1		4 cell no PB-1	chr6	140571319	52	13		8-cell-mouse-8	chr6	140571319	36	6
		chr6	140571362	50	0			chr6	140571383	1	0			chr6	140571362	21	0			chr6	140571362	21	3
		chr6	140571383	53	0			chr6	140571387	1	1			chr6	140571383	23	0			chr6	140571383	23	1
		chr6	140571387	50	0			chr6	140571941	9	7			chr6	140571387	20	0			chr6	140571387	18	3
		chr6	140571390	53	0			chr6	140571946	9	2			chr6	140571390	23	0			chr6	140571390	23	1
	Zygote-Smith-no-pb-3	chr6	140571319	15	14		2-cell-Smith-no pb-3	chr6	140571362	16	0								8 cell-mouse-5	chr6	140571319	153	28
		chr6	140571362	7	0			chr6	140571383	16	2									chr6	140571362	85	31
		chr6	140571383	8	0			chr6	140571387	15	2									chr6	140571383	84	17
		chr6	140571387	7	0			chr6	140571390	16	2									chr6	140571387	83	17
		chr6	140571390	8	0			chr6	140571941	33	5									chr6	140571390	83	7
	Zygote-Smith-no-pb-4	chr6	140571319	6	0														8 cell noPB-2	chr6	140571319	48	0
		chr6	140571362	5	2															chr6	140571362	23	0
		chr6	140571383	4	0															chr6	140571383	23	0
		chr6	140571387	5	2															chr6	140571387	19	0
		chr6	140571390	5	2															chr6	140571390	23	0
		chr6	140571319	30	1														8 cell noPB-1	chr6	140571319	35	0
	paternal	chr6	140571362	21	0															chr6	140571362	31	4
		chr6	140571383	18	0															chr6	140571383	33	0
		chr6	140571387	17	0															chr6	140571387	31	4
		chr6	140571390	18	0															chr6	140571390	31	0
	Zygote-Smith-no-pb2-4	chr6	140571319	19	0														8 cell noPB-3	chr6	140571319	34	2
		chr6	140571362	9	5															chr6	140571362	9	2
		chr6	140571383	10	0															chr6	140571383	13	2
		chr6	140571387	10	6															chr6	140571387	10	0
		chr6	140571390	10	6															chr6	140571390	13	0
	Zygote-Smith-no-pb2-5	chr6	140571319	39	0
		chr6	140571362	14	0
		chr6	140571383	16	0
		chr6	140571387	14	0
		chr6	140571390	15	0
	* Smith et al CpG sites are one base skewed
[truncated: 4 more columns]

## Sheet: Human P1
		#Chr	Pos (hg19)	Ref	Chain	Total	Met	UnMet	MetRate	Ref_context	Type
	2-cell-1	chr12	19556812	g	-	1	0	1	0	CGC	CpG	SINE
	2-cell-2	chr12	19556812	g	-	2	0	2	0	CGC	CpG
	4-cell	chr12	19556812	g	-	3	0	3	0	CGC	CpG
	4-cell-2	chr12	19556812	g	-	5	0	5	0	CGC	CpG
	8-cell-1	chr12	19556811	c	+	3	0	3	0	CGT	CpG
		chr12	19556812	g	-	3	0	3	0	CGC	CpG
	8-cell-2	chr12	19556811	c	+	1	0	1	0	CGT	CpG
		chr12	19556812	g	-	4	0	4	0	CGC	CpG
		chr12	19556814	g	-	4	0	4	0	CAC	CHH
		chr12	19556820	g	-	1	0	1	0	CGG	CpG
	morula-16 cells	chr12	19556811	c	+	1	0	1	0	CGT	CpG
		chr12	19556812	g	-	4	0	4	0	CGC	CpG
		chr12	19556814	g	-	4	0	4	0	CAC	CHH
		chr12	19556820	g	-	2	2	0	1	CGG	CpG
	LINE	chr12	19557529	g	-	1	1	0	1	CGG	CpG
		chr12	19557530	g	-	1	0	1	0	CCG	CHG
		chr12	19557540	g	-	1	0	1	0	CGG	CpG
	Zygote	chr12	19556812	g	-	6	4	2	0.666667	CGC	CpG
		chr12	19556814	g	-	6	0	6	0	CAC	CHH
		chr12	19556820	g	-	3	3	0	1	CGG	CpG
		chr12	19560125	c	+	2	2	0	1	CGG	CpG
